# Supplementary material for: Biological variation estimates for spot urine analytes and analyte/creatinine ratios in 33 healthy subjects
Source: publisher site journal article supplement (doi:10.1515/cclm-2022-1290), 2023-02-16
Supplement: Supplementary file 1 [file j_cclm-2022-1290_suppl_001.docx]

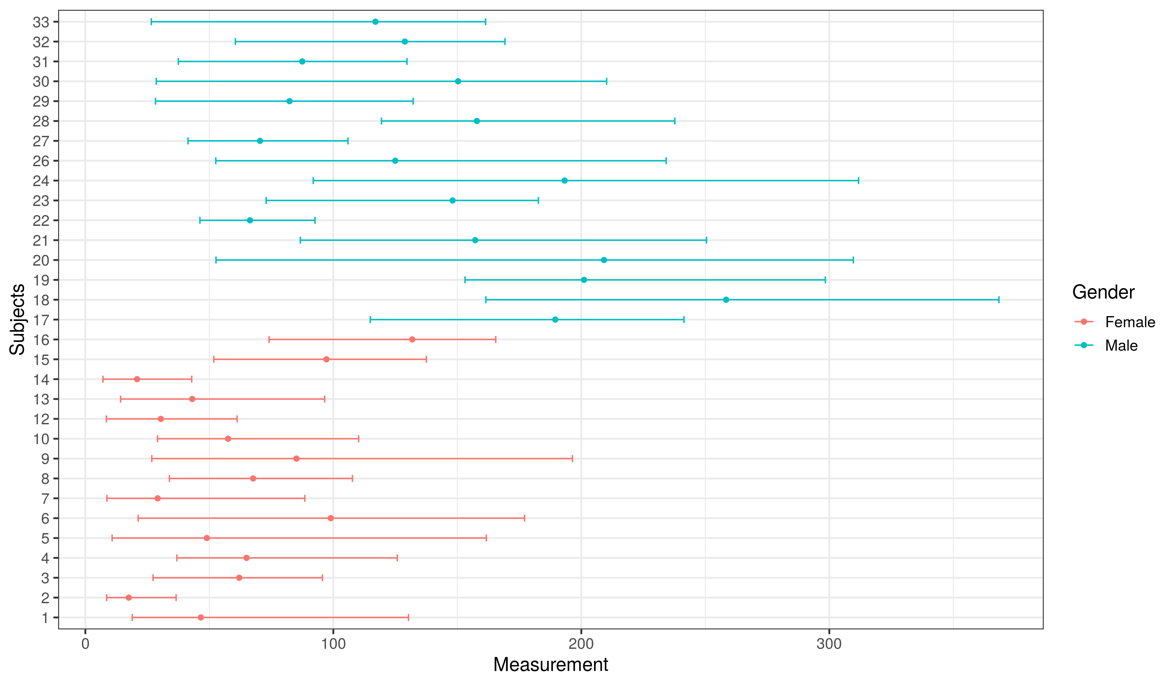


Figure 1. Distribution of creatinine concentrations (mg/dL) for individuals based on weekly samplings for 10 weeks.


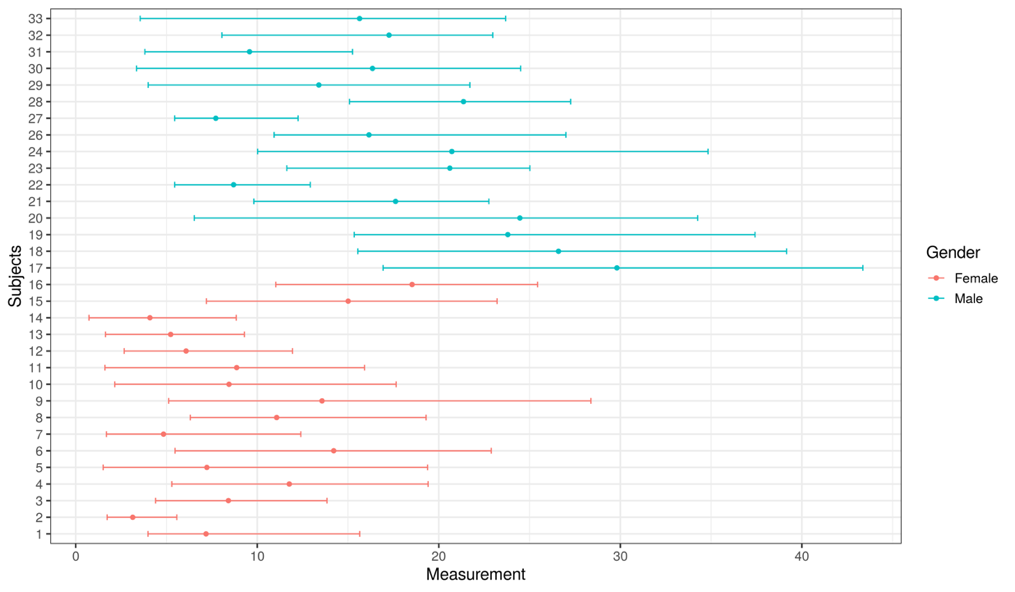


Figure 2. Distribution of urea concentrations (g/L) for individuals based on weekly samplings for 10 weeks.


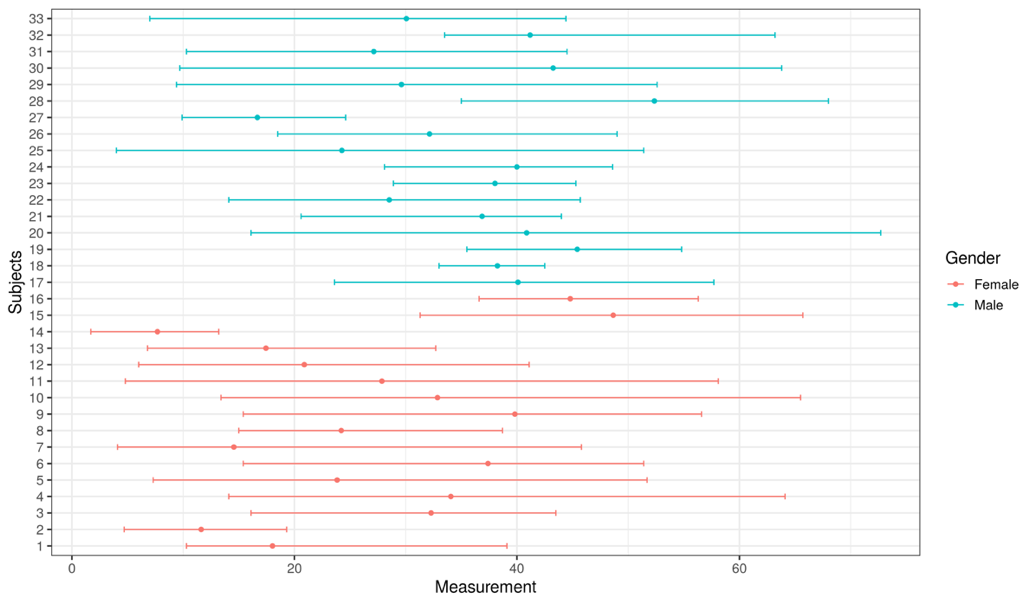


Figure 3. Distribution of uric acid concentrations (mg/dL) for individuals based on weekly samplings for 10 weeks.


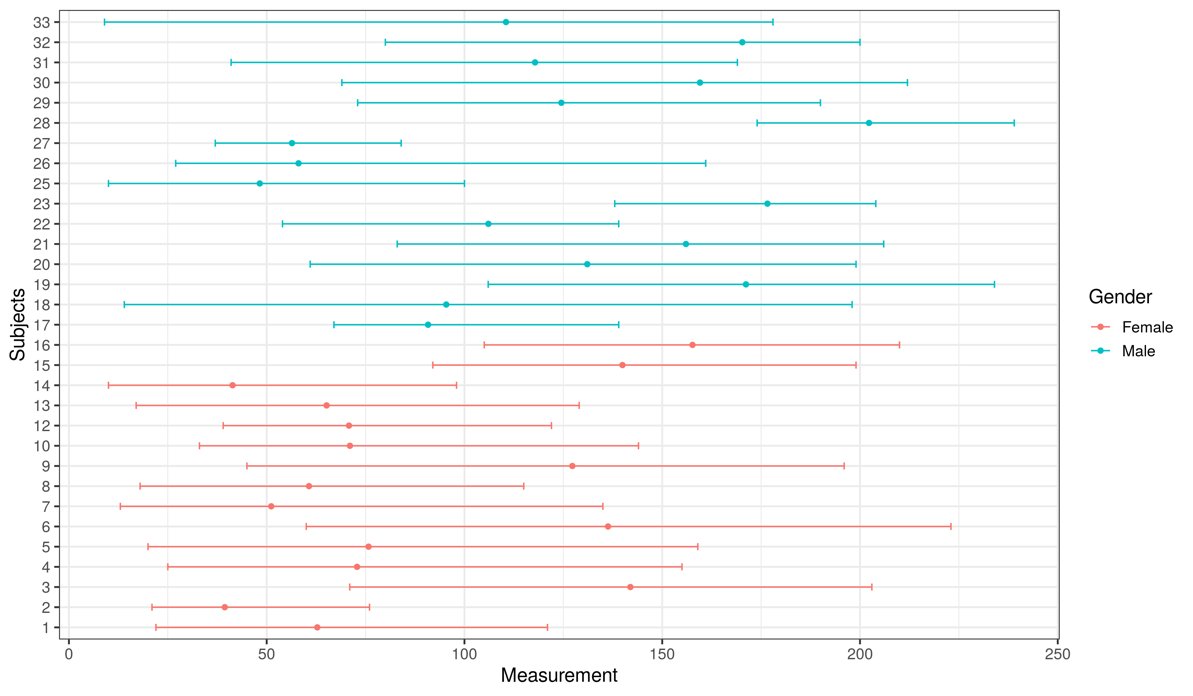


Figure 4. Distribution of sodium concentrations (mmol/L) for individuals based on weekly samplings for 10 weeks.


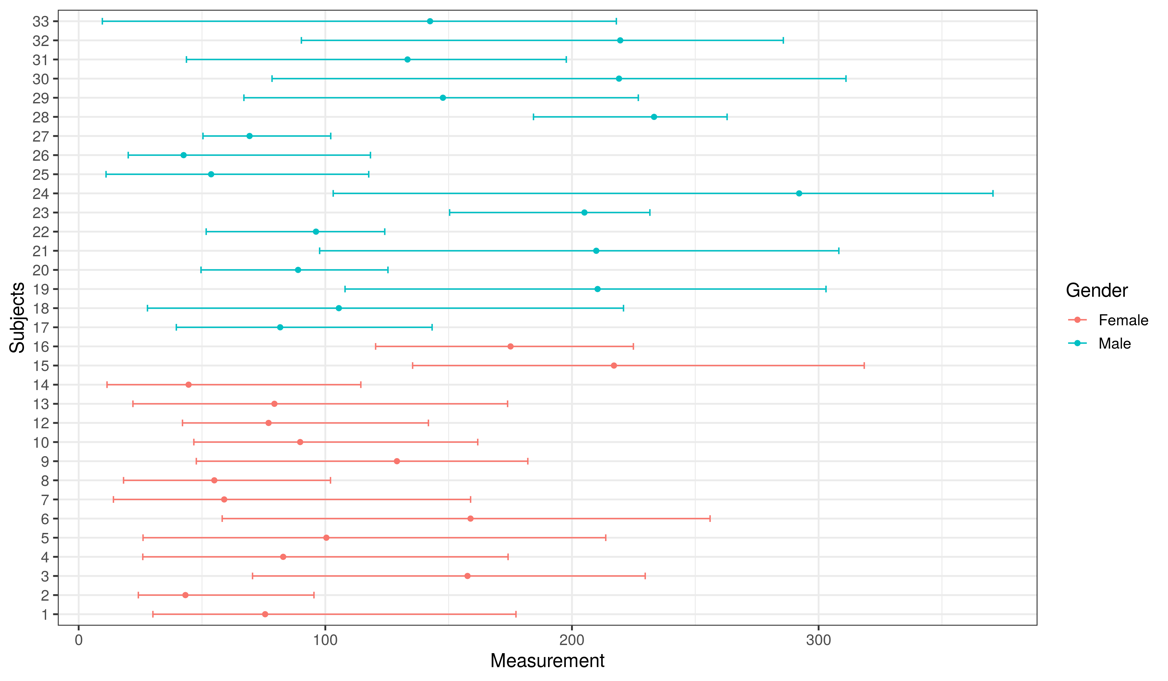


Figure 5. Distribution of chloride concentrations (mmol/L) for individuals based on weekly samplings for 10 weeks.


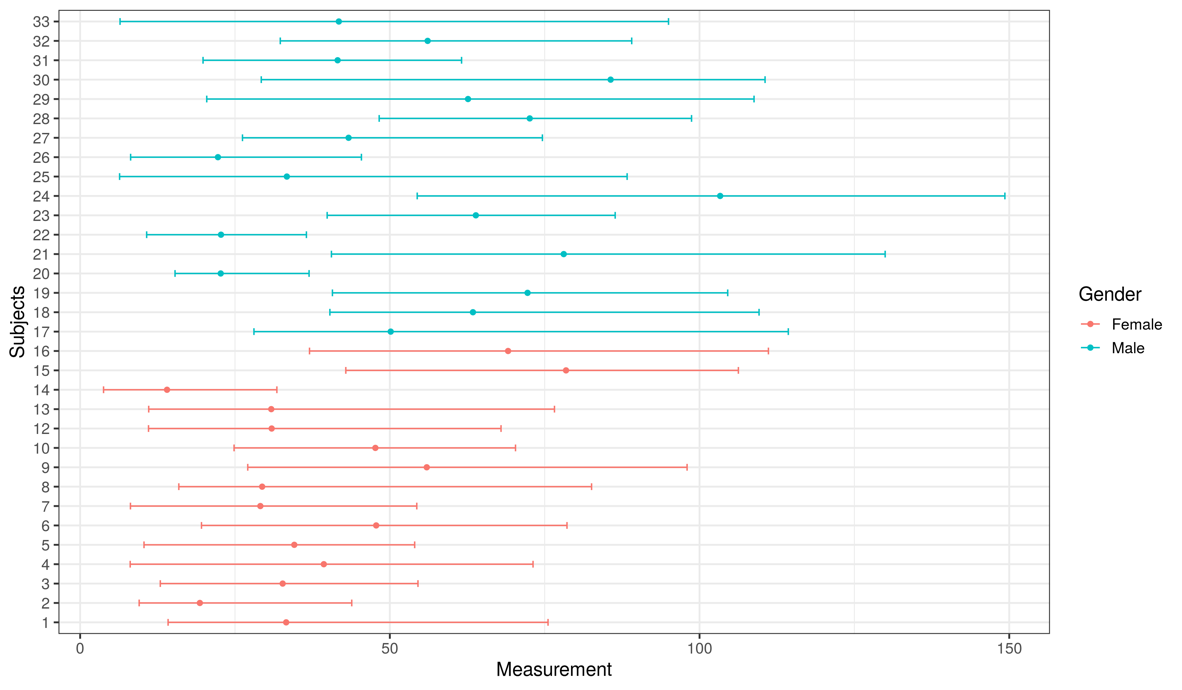


Figure 6. Distribution of potassium concentrations (mmol/L) for individuals based on weekly samplings for 10 weeks.


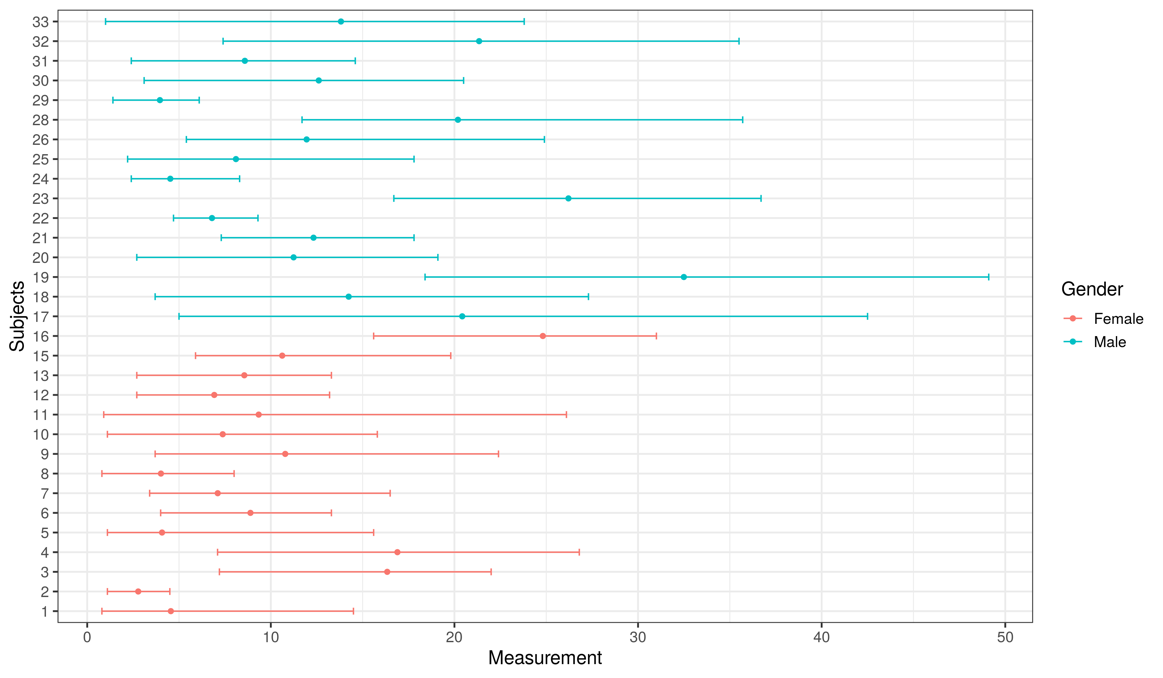


Figure 7. Distribution of calcium concentrations (mg/dL) for individuals based on weekly samplings for 10 weeks.


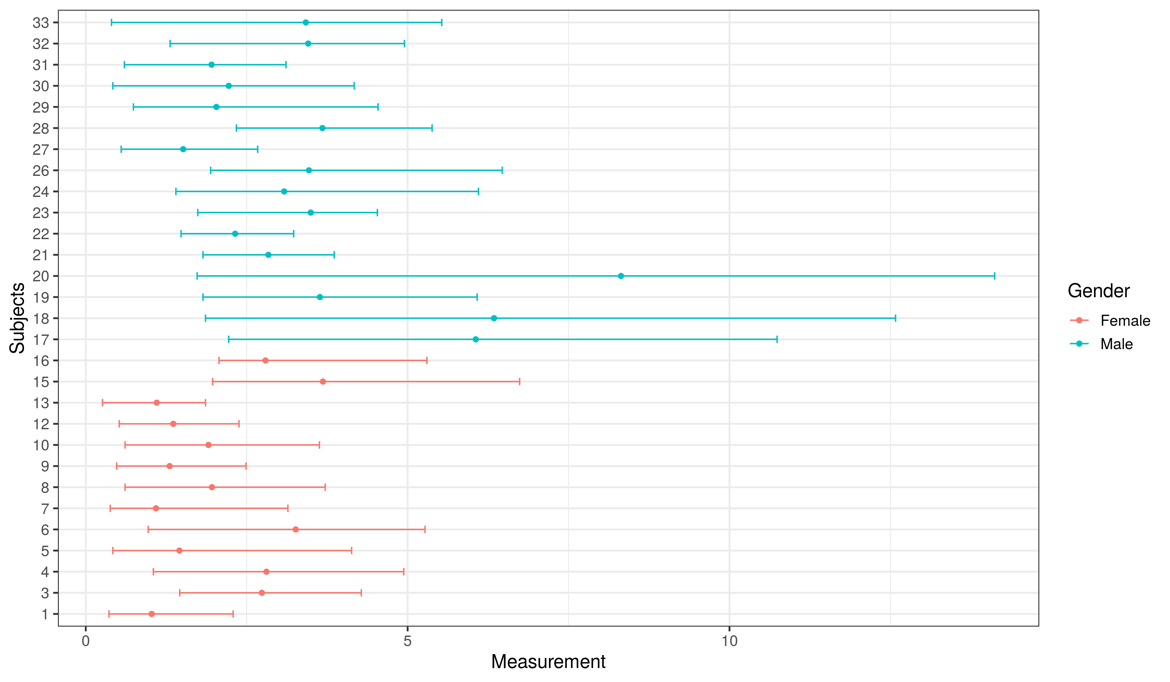


Figure 8. Distribution of magnesium concentrations (mmol/L) for individuals based on weekly samplings for 10 weeks.


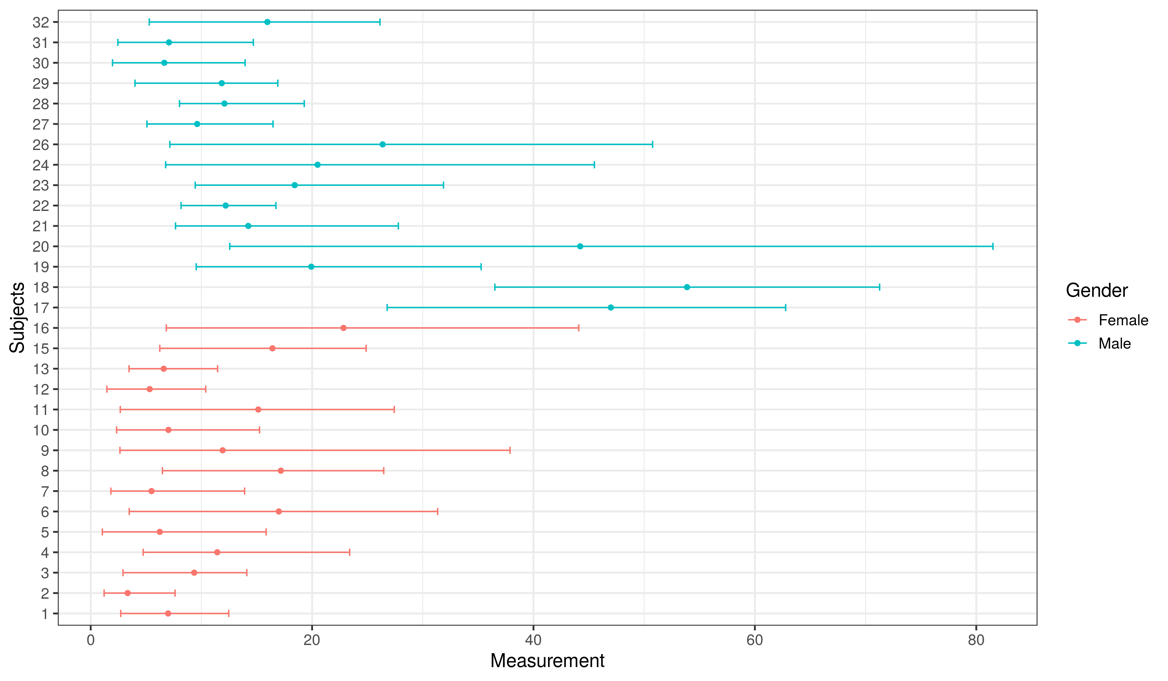


Figure 9. Distribution of phosphate concentrations (mmol/L) for individuals based on weekly samplings for 10 weeks.


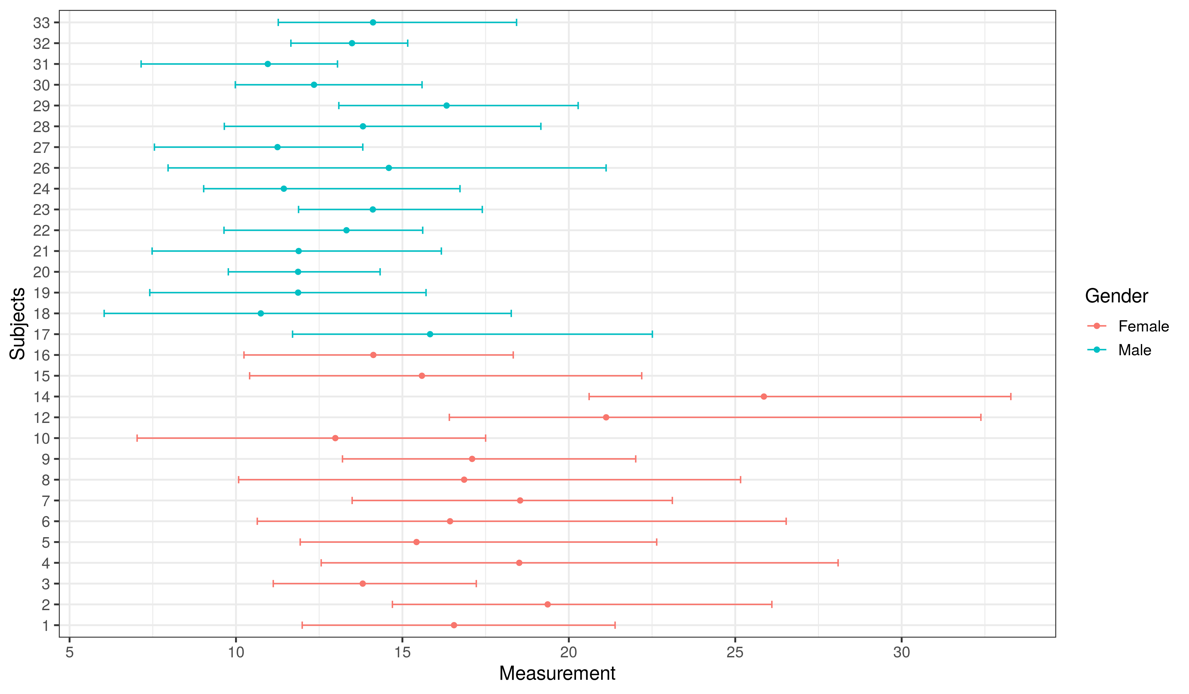


Figure 10. Distribution of urea/creatinine ratio (g/g creatinine) for individuals based on weekly samplings for 10 weeks.


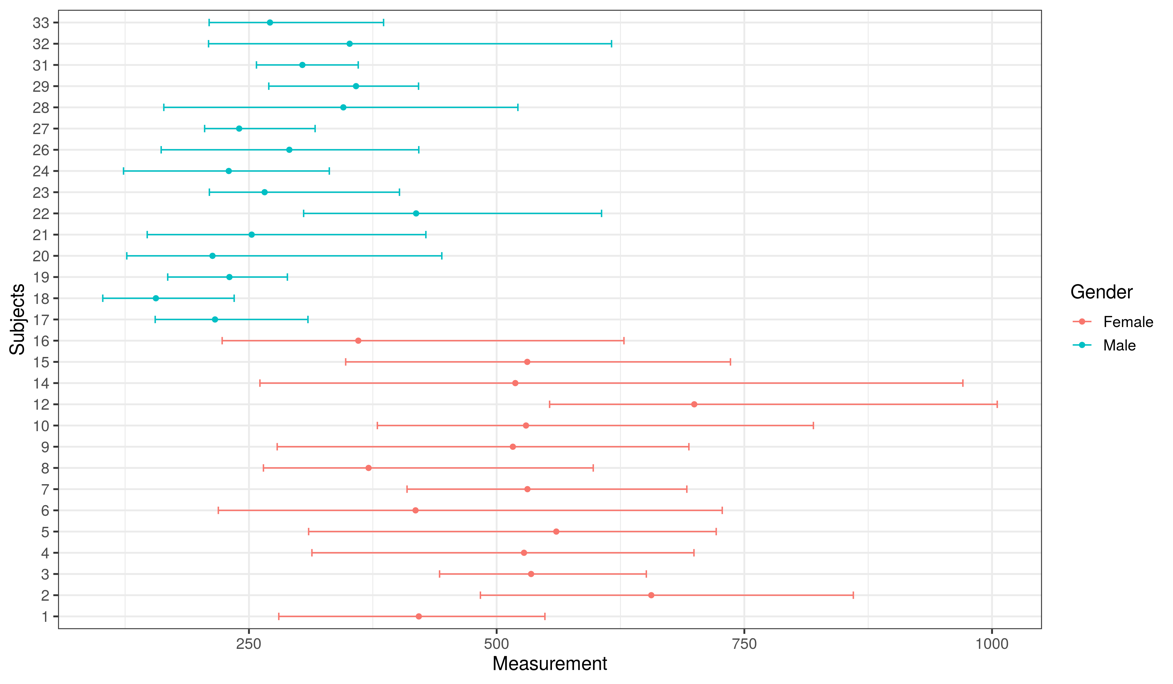


Figure 11. Distribution of uric acid/creatinine ratio (mg/g creatinine) for individuals based on weekly samplings for 10 weeks.


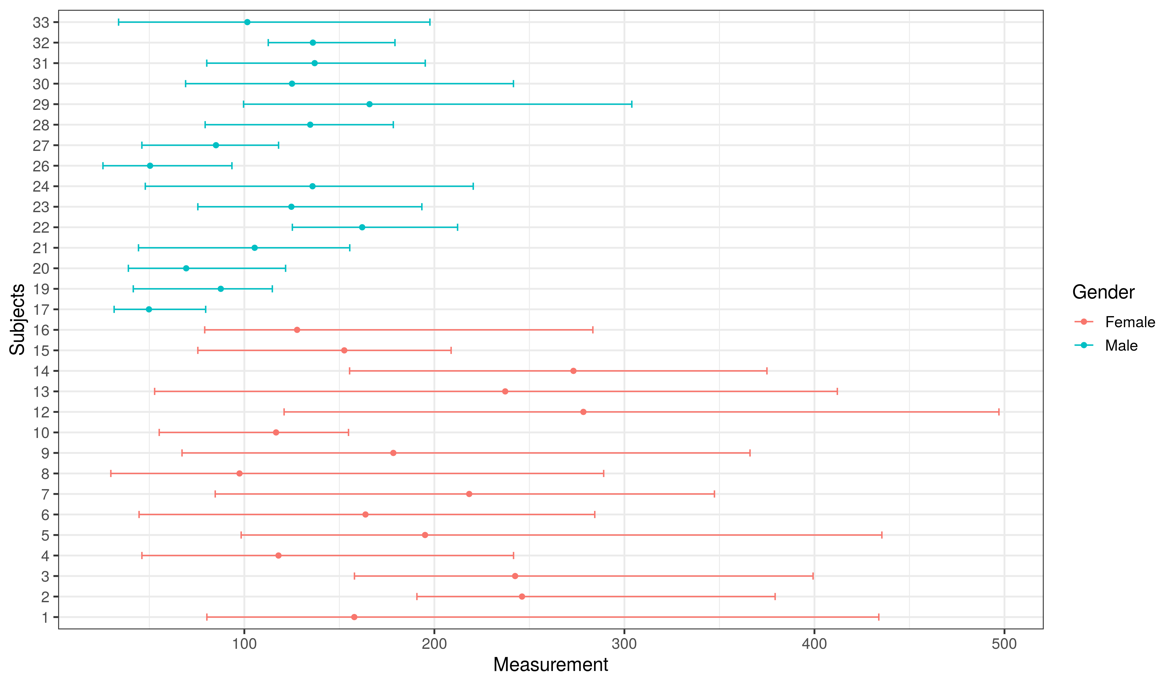


Figure 12. Distribution of sodium/creatinine ratio (mmol/g creatinine) for individuals based on weekly samplings for 10 weeks.


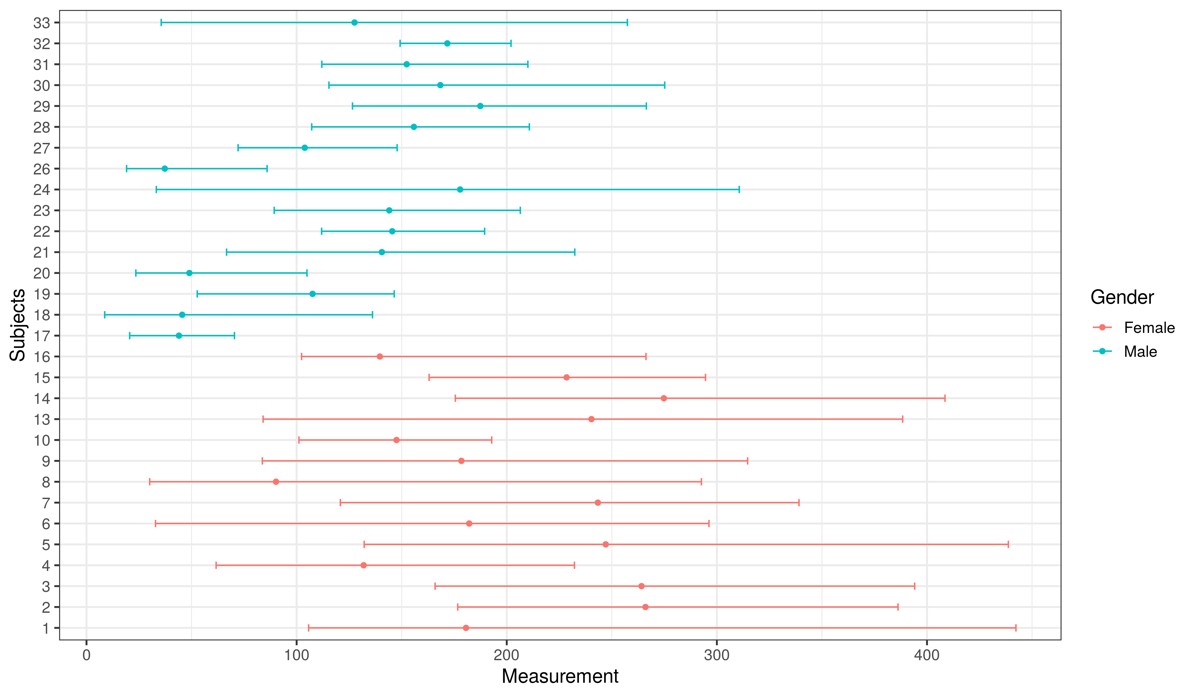


Figure 13. Distribution of chloride/creatinine ratio (mmol/g creatinine) for individuals based on weekly samplings for 10 weeks.


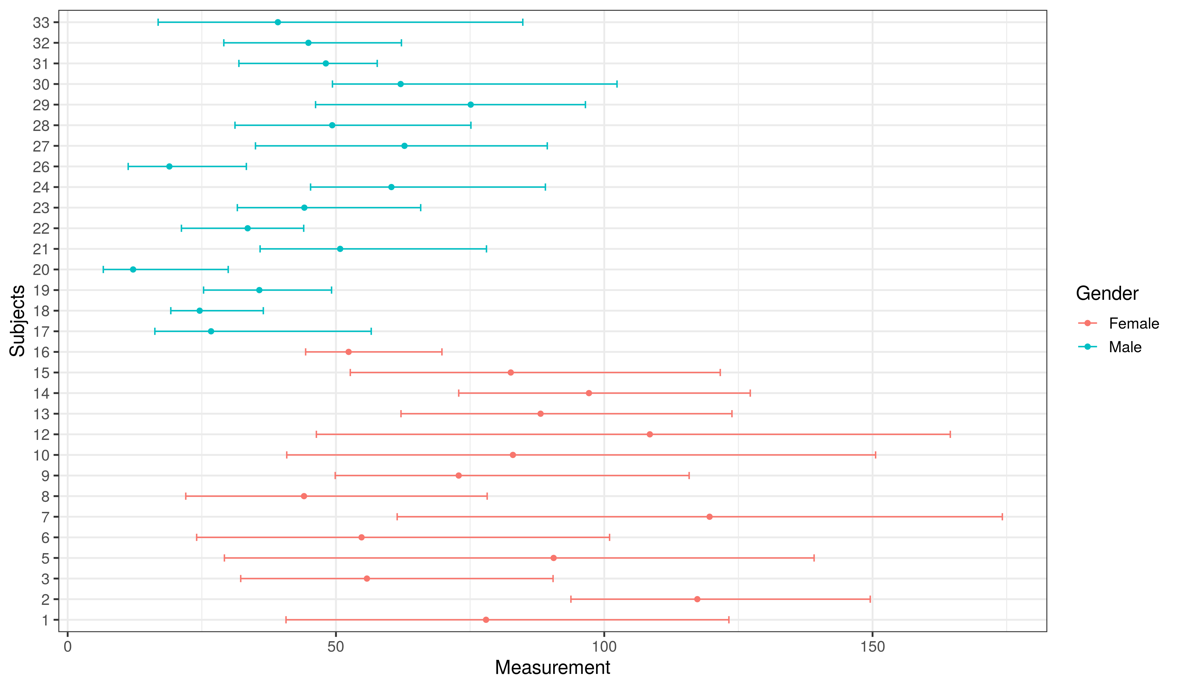


Figure 14. Distribution of potassium/creatinine ratio (mmol/g creatinine) for individuals based on weekly samplings for 10 weeks.


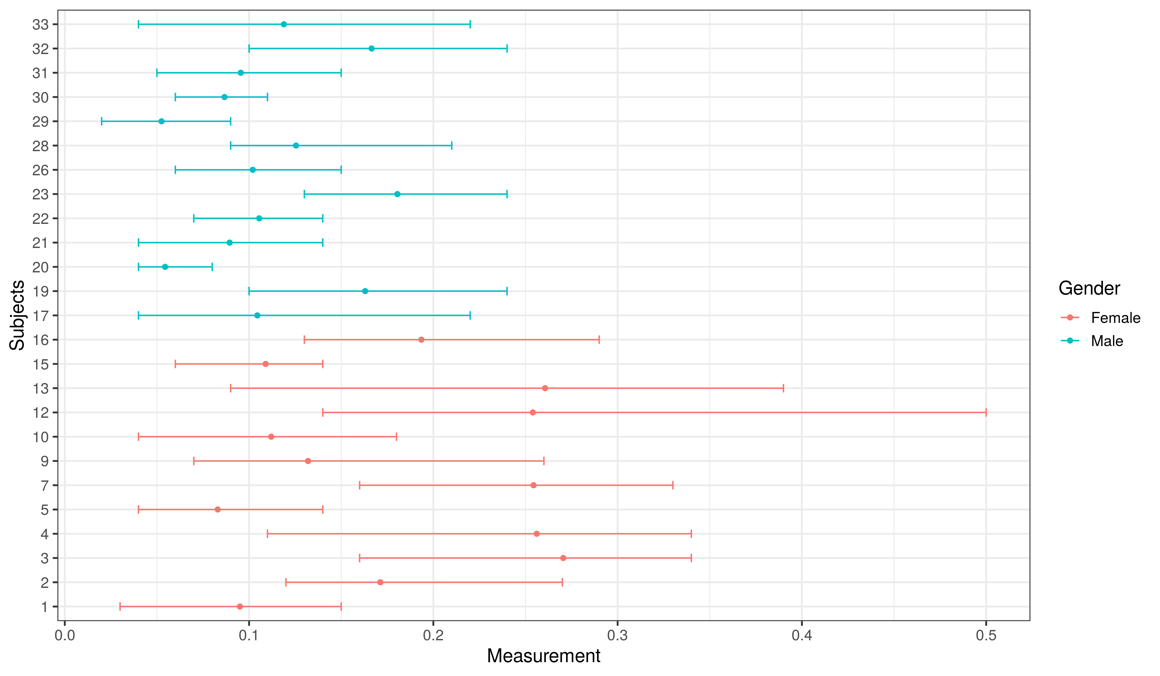


Figure 15. Distribution of calcium/creatinine ratio (mg/mg creatinine) for individuals based on weekly samplings for 10 weeks.


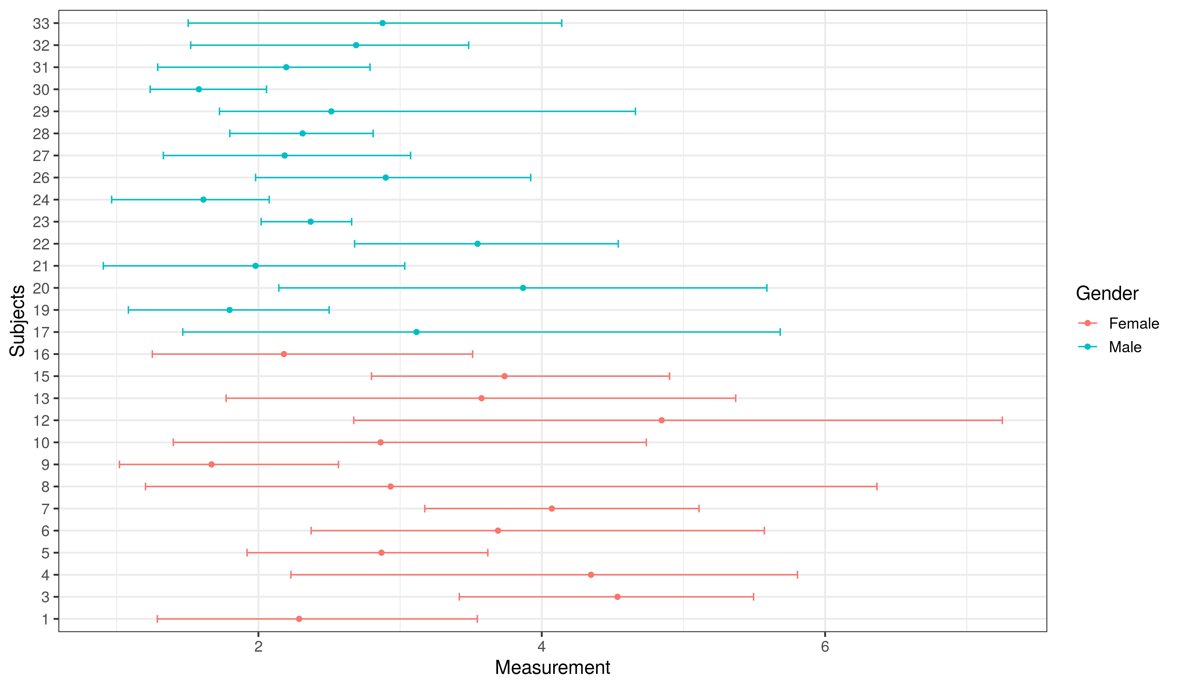


Figure 16. Distribution of magnesium/creatinine ratio (mmol/g creatinine) for individuals based on weekly samplings for 10 weeks.


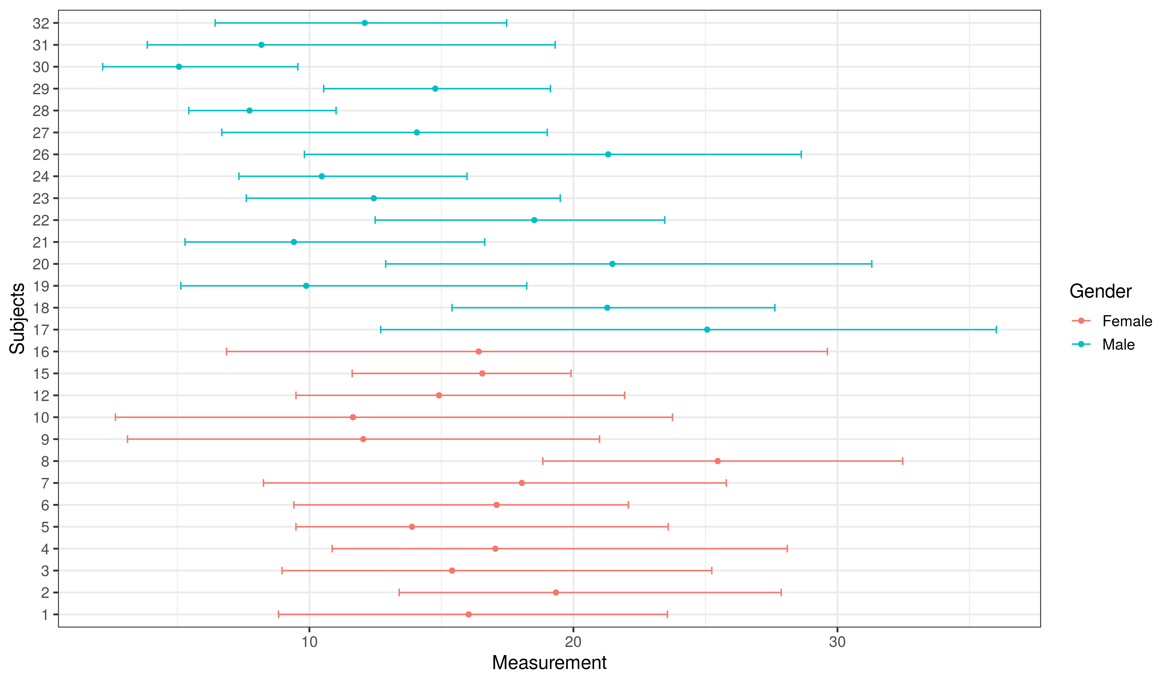


Figure 17. Distribution of phosphate/creatinine ratio (mmol/g creatinine) for individuals based on weekly samplings for 10 weeks.
